# Supplementary material
Source: publisher figshare collection journal article supplement (https://acs.figshare.com/ndownloader/files/4161727)
Supplement: Supplementary file 1 [file 4161727]

data_publication_text
_publ_requested_journal          J.Am.Chem.Soc.
_publ_contact_author_name        'David P. Goldberg'
_publ_contact_author_address     
;Department of Chemistry
Johns Hopkins University
Baltimore, Maryland, 21218
United States
;
_publ_contact_author_email       dpg@jhu.edu
_publ_contact_author_phone       410.516.6658
loop_
_publ_author_name
_publ_author_address
'McQuilken, Alison C.'
;Department of Chemistry
Johns Hopkins University
Baltimore, Maryland, 21218
United States
;
'Jiang, Yunbo'
;Department of Chemistry
Johns Hopkins University
Baltimore, Maryland, 21218
United States
;
'Siegler, Maxime A.'
;Department of Chemistry
Johns Hopkins University
Baltimore, Maryland, 21218
United States
;
'Goldberg, David P.'
;Department of Chemistry
Johns Hopkins University
Baltimore, Maryland, 21218
United States
;
 
data_1 
 
_audit_creation_method            SHELXL-97 
_chemical_name_systematic 
; 
 ? 
; 
_chemical_name_common             ? 
_chemical_melting_point           ? 
_chemical_formula_moiety          
 'C26 H24 Fe N5 S, B F4' 
_chemical_formula_sum 
 'C26 H24 B F4 Fe N5 S' 
_chemical_formula_weight          581.22 
 
loop_ 
 _atom_type_symbol 
 _atom_type_description 
 _atom_type_scat_dispersion_real 
 _atom_type_scat_dispersion_imag 
 _atom_type_scat_source 
 'C'  'C'   0.0033   0.0016 
 'International Tables Vol C Tables 4.2.6.8 and 6.1.1.4' 
 'H'  'H'   0.0000   0.0000 
 'International Tables Vol C Tables 4.2.6.8 and 6.1.1.4' 
 'B'  'B'   0.0013   0.0007 
 'International Tables Vol C Tables 4.2.6.8 and 6.1.1.4' 
 'F'  'F'   0.0171   0.0103 
 'International Tables Vol C Tables 4.2.6.8 and 6.1.1.4' 
 'Fe'  'Fe'   0.3463   0.8444 
 'International Tables Vol C Tables 4.2.6.8 and 6.1.1.4' 
 'N'  'N'   0.0061   0.0033 
 'International Tables Vol C Tables 4.2.6.8 and 6.1.1.4' 
 'S'  'S'   0.1246   0.1234 
 'International Tables Vol C Tables 4.2.6.8 and 6.1.1.4' 
 
_symmetry_cell_setting            orthorhombic 
_symmetry_space_group_name_H-M    'P b c a'
_symmetry_space_group_name_Hall   '-P 2ac 2ab' 
 
loop_ 
 _symmetry_equiv_pos_as_xyz 
 'x, y, z' 
 '-x+1/2, -y, z+1/2' 
 'x+1/2, -y+1/2, -z' 
 '-x, y+1/2, -z+1/2' 
 '-x, -y, -z' 
 'x-1/2, y, -z-1/2' 
 '-x-1/2, y-1/2, z' 
 'x, -y-1/2, z-1/2' 
 
_cell_length_a                    12.40931(14) 
_cell_length_b                    14.52864(16) 
_cell_length_c                    27.6028(3) 
_cell_angle_alpha                 90.00 
_cell_angle_beta                  90.00 
_cell_angle_gamma                 90.00 
_cell_volume                      4976.52(10) 
_cell_formula_units_Z             8 
_cell_measurement_temperature     110(2) 
_cell_measurement_reflns_used     30334 
_cell_measurement_theta_min       1.58 
_cell_measurement_theta_max       27.62 
 
_exptl_crystal_description        block 
_exptl_crystal_colour             'dark brown' 
_exptl_crystal_size_max           0.50 
_exptl_crystal_size_mid           0.39 
_exptl_crystal_size_min           0.25 
_exptl_crystal_density_meas       ? 
_exptl_crystal_density_diffrn     1.552 
_exptl_crystal_density_method     'not measured' 
_exptl_crystal_F_000              2384 
_exptl_absorpt_coefficient_mu     0.747 
_exptl_absorpt_correction_type    analytical 
_exptl_absorpt_correction_T_min   0.721 
_exptl_absorpt_correction_T_max   0.866 
_exptl_absorpt_process_details    
;
CrysAlisPro, Oxford Diffraction Ltd.,
Version 1.171.34.44 (release 25-10-2010 CrysAlis171 .NET)
(compiled Oct 25 2010,18:11:34)
Analytical numeric absorption correction using a multifaceted crystal
			model based on expressions derived by R.C. Clark & J.S. Reid.
(Clark, R. C. & Reid, J. S. (1995). Acta Cryst. A51, 887-897)
; 
 
_exptl_special_details 
; 
 ? 
; 
 
_diffrn_ambient_temperature       110(2) 
_diffrn_radiation_wavelength      0.71073 
_diffrn_radiation_type            MoK\a 
_diffrn_radiation_source          'Enhance (Mo) X-ray Source' 
_diffrn_radiation_monochromator   'graphite'
_diffrn_measurement_device_type   'Goniometer KM4/Xcalibur, detector: Sapphire3'
_diffrn_measurement_method        '\w scans'
_diffrn_detector_area_resol_mean  15.989  
_diffrn_standards_number          ? 
_diffrn_standards_interval_count  ? 
_diffrn_standards_interval_time   ? 
_diffrn_standards_decay_%         ? 
_diffrn_reflns_number             55244 
_diffrn_reflns_av_R_equivalents   0.0443 
_diffrn_reflns_av_sigmaI/netI     0.0248 
_diffrn_reflns_limit_h_min        -16 
_diffrn_reflns_limit_h_max        16 
_diffrn_reflns_limit_k_min        -18 
_diffrn_reflns_limit_k_max        18 
_diffrn_reflns_limit_l_min        -35 
_diffrn_reflns_limit_l_max        34 
_diffrn_reflns_theta_min          2.21 
_diffrn_reflns_theta_max          27.50 
_reflns_number_total              5709 
_reflns_number_gt                 5028 
_reflns_threshold_expression      'I>2\s(I)' 
 
_computing_data_collection        
;
CrysAlisPro, Oxford Diffraction Ltd.,
Version 1.171.34.44 (release 25-10-2010 CrysAlis171 .NET)
(compiled Oct 25 2010,18:11:34)
; 
_computing_cell_refinement        
;
CrysAlisPro, Oxford Diffraction Ltd.,
Version 1.171.34.44 (release 25-10-2010 CrysAlis171 .NET)
(compiled Oct 25 2010,18:11:34)
; 
_computing_data_reduction         
;
CrysAlisPro, Oxford Diffraction Ltd.,
Version 1.171.34.44 (release 25-10-2010 CrysAlis171 .NET)
(compiled Oct 25 2010,18:11:34)
; 
_computing_structure_solution     'SHELXS-97 (Sheldrick, 2008)' 
_computing_structure_refinement   'SHELXL-97 (Sheldrick, 2008)' 
_computing_molecular_graphics     'SHELXTL v6.10 (Sheldrick, 2008)'
_computing_publication_material   'SHELXTL v6.10 (Sheldrick, 2008)' 
 
_refine_special_details 
; 
 Refinement of F^2^ against ALL reflections.  The weighted R-factor wR and 
 goodness of fit S are based on F^2^, conventional R-factors R are based 
 on F, with F set to zero for negative F^2^. The threshold expression of 
 F^2^ > 2sigma(F^2^) is used only for calculating R-factors(gt) etc. and is 
 not relevant to the choice of reflections for refinement.  R-factors based 
 on F^2^ are statistically about twice as large as those based on F, and R- 
 factors based on ALL data will be even larger. 
; 
 
_refine_ls_structure_factor_coef  Fsqd  
_refine_ls_matrix_type            full 
_refine_ls_weighting_scheme       calc  
_refine_ls_weighting_details 
 'calc w=1/[\s^2^(Fo^2^)+(0.0343P)^2^+3.6802P] where P=(Fo^2^+2Fc^2^)/3' 
_atom_sites_solution_primary      direct 
_atom_sites_solution_secondary    difmap 
_atom_sites_solution_hydrogens    difmap 
_refine_ls_hydrogen_treatment     constr 
_refine_ls_extinction_method      none 
_refine_ls_extinction_coef        ? 
_refine_ls_number_reflns          5709 
_refine_ls_number_parameters      390 
_refine_ls_number_restraints      156 
_refine_ls_R_factor_all           0.0355 
_refine_ls_R_factor_gt            0.0297 
_refine_ls_wR_factor_ref          0.0770 
_refine_ls_wR_factor_gt           0.0739 
_refine_ls_goodness_of_fit_ref    1.051 
_refine_ls_restrained_S_all       1.060 
_refine_ls_shift/su_max           0.002 
_refine_ls_shift/su_mean          0.000 
 
loop_ 
 _atom_site_label 
 _atom_site_type_symbol 
 _atom_site_fract_x 
 _atom_site_fract_y 
 _atom_site_fract_z 
 _atom_site_U_iso_or_equiv 
 _atom_site_adp_type 
 _atom_site_occupancy 
 _atom_site_symmetry_multiplicity 
 _atom_site_calc_flag 
 _atom_site_refinement_flags 
 _atom_site_disorder_assembly 
 _atom_site_disorder_group 
Fe1 Fe 0.857518(16) 0.158451(14) 0.125204(8) 0.01272(7) Uani 1 1 d . . . 
S1 S 0.81503(3) 0.29575(2) 0.162174(14) 0.01596(9) Uani 1 1 d . . . 
C1 C 0.68055(12) 0.28511(10) 0.18034(6) 0.0154(3) Uani 1 1 d . . . 
C2 C 0.64825(13) 0.32160(11) 0.22505(6) 0.0198(3) Uani 1 1 d . . . 
H2 H 0.7005 0.3496 0.2454 0.024 Uiso 1 1 calc R . . 
C3 C 0.54197(14) 0.31786(11) 0.24025(6) 0.0232(3) Uani 1 1 d . . . 
H3 H 0.5219 0.3438 0.2705 0.028 Uiso 1 1 calc R . . 
C4 C 0.46505(13) 0.27631(11) 0.21128(6) 0.0234(3) Uani 1 1 d . . . 
H4 H 0.3920 0.2740 0.2214 0.028 Uiso 1 1 calc R . . 
C5 C 0.49554(13) 0.23791(11) 0.16720(6) 0.0207(3) Uani 1 1 d . . . 
H5 H 0.4429 0.2084 0.1476 0.025 Uiso 1 1 calc R . . 
C6 C 0.60227(12) 0.24200(10) 0.15118(6) 0.0161(3) Uani 1 1 d . . . 
C7 C 0.63084(12) 0.20742(10) 0.10165(6) 0.0168(3) Uani 1 1 d . . . 
H7A H 0.6614 0.2589 0.0826 0.020 Uiso 1 1 calc R . . 
H7B H 0.5641 0.1870 0.0852 0.020 Uiso 1 1 calc R . . 
C8 C 0.73934(12) 0.10405(10) 0.05055(5) 0.0166(3) Uani 1 1 d . . . 
H8 H 0.6754 0.0861 0.0306 0.020 Uiso 1 1 calc R . . 
C9 C 0.79767(12) 0.18716(10) 0.03064(6) 0.0167(3) Uani 1 1 d . . . 
C10 C 0.78489(14) 0.22378(11) -0.01528(6) 0.0217(3) Uani 1 1 d . . . 
H10 H 0.7348 0.1979 -0.0375 0.026 Uiso 1 1 calc R . . 
C11 C 0.84702(15) 0.29897(12) -0.02804(6) 0.0253(4) Uani 1 1 d . . . 
H11 H 0.8404 0.3255 -0.0594 0.030 Uiso 1 1 calc R . . 
C12 C 0.91896(14) 0.33528(11) 0.00526(6) 0.0240(3) Uani 1 1 d . . . 
H12 H 0.9618 0.3871 -0.0030 0.029 Uiso 1 1 calc R . . 
C13 C 0.92791(13) 0.29551(10) 0.05057(6) 0.0197(3) Uani 1 1 d . . . 
H13 H 0.9769 0.3210 0.0734 0.024 Uiso 1 1 calc R . . 
C14 C 0.82362(12) 0.02935(10) 0.05324(6) 0.0170(3) Uani 1 1 d . . . 
C15 C 0.83662(14) -0.04101(11) 0.02017(6) 0.0218(3) Uani 1 1 d . . . 
H15 H 0.7873 -0.0490 -0.0058 0.026 Uiso 1 1 calc R . . 
C16 C 0.92387(14) -0.09991(11) 0.02596(6) 0.0252(4) Uani 1 1 d . . . 
H16 H 0.9359 -0.1485 0.0036 0.030 Uiso 1 1 calc R . . 
C17 C 0.99302(14) -0.08709(11) 0.06470(7) 0.0246(4) Uani 1 1 d . . . 
H17 H 1.0522 -0.1276 0.0696 0.029 Uiso 1 1 calc R . . 
C18 C 0.97525(13) -0.01470(11) 0.09632(6) 0.0209(3) Uani 1 1 d . . . 
H18 H 1.0229 -0.0062 0.1229 0.025 Uiso 1 1 calc R . . 
C19 C 0.66653(13) 0.05021(10) 0.13056(6) 0.0178(3) Uani 1 1 d . . . 
H19A H 0.6858 -0.0086 0.1147 0.021 Uiso 1 1 calc R . . 
H19B H 0.5870 0.0543 0.1323 0.021 Uiso 1 1 calc R . . 
C20 C 0.71353(13) 0.05343(10) 0.18061(6) 0.0179(3) Uani 1 1 d . . . 
C21 C 0.66174(15) 0.01648(11) 0.22075(6) 0.0243(4) Uani 1 1 d . . . 
H21 H 0.5912 -0.0083 0.2179 0.029 Uiso 1 1 calc R . . 
C22 C 0.71440(17) 0.01634(12) 0.26494(6) 0.0292(4) Uani 1 1 d . . . 
H22 H 0.6804 -0.0083 0.2929 0.035 Uiso 1 1 calc R . . 
C23 C 0.81730(16) 0.05258(12) 0.26784(6) 0.0272(4) Uani 1 1 d . . . 
H23 H 0.8559 0.0513 0.2976 0.033 Uiso 1 1 calc R . . 
C24 C 0.86315(14) 0.09064(11) 0.22680(6) 0.0212(3) Uani 1 1 d . . . 
H24 H 0.9331 0.1168 0.2291 0.025 Uiso 1 1 calc R . . 
C25 C 1.09229(13) 0.19675(11) 0.14985(6) 0.0204(3) Uani 1 1 d . . . 
C26 C 1.20500(13) 0.21816(13) 0.15882(7) 0.0291(4) Uani 1 1 d . . . 
H26A H 1.2506 0.1710 0.1438 0.044 Uiso 1 1 calc R . . 
H26B H 1.2183 0.2194 0.1938 0.044 Uiso 1 1 calc R . . 
H26C H 1.2221 0.2785 0.1449 0.044 Uiso 1 1 calc R . . 
N1 N 0.71007(10) 0.12925(8) 0.10183(5) 0.0147(2) Uani 1 1 d . . . 
N2 N 0.86875(10) 0.22133(9) 0.06318(5) 0.0155(3) Uani 1 1 d . . . 
N3 N 0.89245(10) 0.04383(9) 0.09050(5) 0.0161(3) Uani 1 1 d . . . 
N4 N 0.81232(11) 0.09197(8) 0.18370(5) 0.0164(3) Uani 1 1 d . . . 
N5 N 1.00405(10) 0.17999(9) 0.14255(5) 0.0178(3) Uani 1 1 d . . . 
B1 B 0.1483(7) 0.4676(6) 0.1019(3) 0.0243(13) Uani 0.588(18) 1 d PDU A 1 
F1 F 0.2547(3) 0.4447(7) 0.10919(18) 0.0644(15) Uani 0.588(18) 1 d PDU A 1 
F2 F 0.0849(4) 0.4132(4) 0.1312(2) 0.0385(10) Uani 0.588(18) 1 d PDU A 1 
F3 F 0.1309(9) 0.5575(5) 0.1139(3) 0.0576(17) Uani 0.588(18) 1 d PDU A 1 
F4 F 0.1196(9) 0.4528(7) 0.0542(3) 0.0492(19) Uani 0.588(18) 1 d PDU A 1 
B1' B 0.1537(10) 0.4750(9) 0.0978(5) 0.0254(18) Uani 0.412(18) 1 d PDU A 2 
F1' F 0.2628(4) 0.4929(11) 0.1017(4) 0.067(2) Uani 0.412(18) 1 d PDU A 2 
F2' F 0.1223(14) 0.4022(5) 0.1255(4) 0.062(2) Uani 0.412(18) 1 d PDU A 2 
F3' F 0.1038(6) 0.5546(7) 0.1136(5) 0.0320(14) Uani 0.412(18) 1 d PDU A 2 
F4' F 0.1310(11) 0.4612(8) 0.0494(4) 0.0343(16) Uani 0.412(18) 1 d PDU A 2 
 
loop_ 
 _atom_site_aniso_label 
 _atom_site_aniso_U_11 
 _atom_site_aniso_U_22 
 _atom_site_aniso_U_33 
 _atom_site_aniso_U_23 
 _atom_site_aniso_U_13 
 _atom_site_aniso_U_12 
Fe1 0.01111(11) 0.01315(11) 0.01391(12) -0.00061(7) -0.00070(7) 0.00041(7) 
S1 0.01285(17) 0.01468(17) 0.02035(19) -0.00322(13) 0.00080(14) -0.00084(13) 
C1 0.0144(7) 0.0124(6) 0.0193(7) 0.0010(5) 0.0010(6) 0.0015(5) 
C2 0.0197(8) 0.0176(7) 0.0222(8) -0.0033(6) 0.0002(6) -0.0003(6) 
C3 0.0241(8) 0.0221(8) 0.0234(8) -0.0039(6) 0.0072(7) 0.0022(6) 
C4 0.0161(7) 0.0249(8) 0.0292(9) 0.0003(7) 0.0057(6) 0.0010(6) 
C5 0.0141(7) 0.0228(8) 0.0251(8) -0.0004(6) -0.0005(6) -0.0006(6) 
C6 0.0153(7) 0.0144(7) 0.0187(8) 0.0005(5) 0.0002(6) 0.0023(5) 
C7 0.0137(7) 0.0198(7) 0.0169(7) -0.0008(6) -0.0028(6) 0.0026(6) 
C8 0.0156(7) 0.0194(7) 0.0148(7) -0.0037(6) -0.0008(6) -0.0005(6) 
C9 0.0159(7) 0.0176(7) 0.0167(7) -0.0024(6) 0.0005(6) 0.0041(6) 
C10 0.0245(8) 0.0247(8) 0.0160(8) -0.0016(6) 0.0000(6) 0.0075(6) 
C11 0.0332(9) 0.0259(9) 0.0167(8) 0.0043(6) 0.0073(7) 0.0100(7) 
C12 0.0252(8) 0.0193(7) 0.0274(9) 0.0037(6) 0.0113(7) 0.0030(6) 
C13 0.0178(7) 0.0178(7) 0.0236(8) -0.0012(6) 0.0050(6) 0.0014(6) 
C14 0.0177(7) 0.0165(7) 0.0168(7) -0.0011(6) 0.0021(6) -0.0030(6) 
C15 0.0251(8) 0.0193(8) 0.0209(8) -0.0044(6) 0.0042(6) -0.0056(6) 
C16 0.0320(9) 0.0158(7) 0.0278(9) -0.0054(6) 0.0110(7) -0.0021(7) 
C17 0.0244(8) 0.0171(7) 0.0322(9) 0.0015(6) 0.0078(7) 0.0047(6) 
C18 0.0196(8) 0.0185(7) 0.0247(8) 0.0012(6) 0.0020(6) 0.0027(6) 
C19 0.0165(7) 0.0153(7) 0.0217(8) -0.0016(6) 0.0018(6) -0.0041(6) 
C20 0.0224(8) 0.0117(6) 0.0197(8) -0.0010(6) 0.0029(6) 0.0023(6) 
C21 0.0307(9) 0.0164(7) 0.0258(9) -0.0001(6) 0.0082(7) -0.0018(6) 
C22 0.0469(11) 0.0201(8) 0.0207(8) 0.0025(6) 0.0102(8) 0.0017(8) 
C23 0.0428(11) 0.0235(8) 0.0152(8) -0.0001(6) -0.0008(7) 0.0054(7) 
C24 0.0266(8) 0.0191(7) 0.0177(8) -0.0018(6) -0.0030(6) 0.0045(6) 
C25 0.0179(8) 0.0217(8) 0.0214(8) -0.0006(6) -0.0011(6) 0.0026(6) 
C26 0.0147(8) 0.0349(10) 0.0377(10) 0.0026(8) -0.0033(7) -0.0022(7) 
N1 0.0142(6) 0.0154(6) 0.0144(6) -0.0013(5) 0.0001(5) -0.0005(5) 
N2 0.0141(6) 0.0155(6) 0.0168(6) -0.0008(5) 0.0013(5) 0.0016(5) 
N3 0.0163(6) 0.0152(6) 0.0169(6) 0.0001(5) 0.0018(5) -0.0004(5) 
N4 0.0190(6) 0.0137(6) 0.0166(6) -0.0006(5) 0.0004(5) 0.0027(5) 
N5 0.0162(7) 0.0179(6) 0.0194(7) -0.0020(5) -0.0005(5) 0.0023(5) 
B1 0.026(2) 0.026(3) 0.021(2) -0.005(2) 0.001(2) -0.002(2) 
F1 0.0255(13) 0.102(4) 0.0652(19) 0.009(2) 0.0034(12) 0.0078(19) 
F2 0.0386(19) 0.0410(19) 0.0359(15) 0.0114(13) 0.0033(13) -0.0095(14) 
F3 0.120(5) 0.0223(16) 0.0299(18) -0.0016(13) 0.005(3) -0.003(3) 
F4 0.061(3) 0.064(3) 0.023(2) -0.0137(19) 0.0067(18) -0.024(2) 
B1' 0.029(3) 0.023(3) 0.024(3) -0.001(3) 0.007(3) 0.003(3) 
F1' 0.0216(17) 0.106(6) 0.073(4) -0.017(4) -0.0030(19) 0.005(3) 
F2' 0.101(6) 0.027(2) 0.058(3) 0.020(2) -0.011(4) -0.010(3) 
F3' 0.032(2) 0.029(2) 0.035(2) -0.0084(19) 0.0089(16) 0.0111(16) 
F4' 0.046(3) 0.034(3) 0.022(2) -0.0091(19) 0.006(2) 0.005(3) 
 
_geom_special_details 
; 
 All esds (except the esd in the dihedral angle between two l.s. planes) 
 are estimated using the full covariance matrix.  The cell esds are taken 
 into account individually in the estimation of esds in distances, angles 
 and torsion angles; correlations between esds in cell parameters are only 
 used when they are defined by crystal symmetry.  An approximate (isotropic) 
 treatment of cell esds is used for estimating esds involving l.s. planes. 
; 
 
loop_ 
 _geom_bond_atom_site_label_1 
 _geom_bond_atom_site_label_2 
 _geom_bond_distance 
 _geom_bond_site_symmetry_2 
 _geom_bond_publ_flag 
Fe1 N5 1.9062(13) . ? 
Fe1 N2 1.9455(13) . ? 
Fe1 N4 1.9634(13) . ? 
Fe1 N3 1.9694(13) . ? 
Fe1 N1 1.9860(13) . ? 
Fe1 S1 2.3018(4) . ? 
S1 C1 1.7494(15) . ? 
C1 C2 1.402(2) . ? 
C1 C6 1.408(2) . ? 
C2 C3 1.385(2) . ? 
C2 H2 0.9500 . ? 
C3 C4 1.384(2) . ? 
C3 H3 0.9500 . ? 
C4 C5 1.391(2) . ? 
C4 H4 0.9500 . ? 
C5 C6 1.398(2) . ? 
C5 H5 0.9500 . ? 
C6 C7 1.499(2) . ? 
C7 N1 1.5021(19) . ? 
C7 H7A 0.9900 . ? 
C7 H7B 0.9900 . ? 
C8 N1 1.5064(19) . ? 
C8 C14 1.509(2) . ? 
C8 C9 1.511(2) . ? 
C8 H8 1.0000 . ? 
C9 N2 1.353(2) . ? 
C9 C10 1.384(2) . ? 
C10 C11 1.383(2) . ? 
C10 H10 0.9500 . ? 
C11 C12 1.386(3) . ? 
C11 H11 0.9500 . ? 
C12 C13 1.382(2) . ? 
C12 H12 0.9500 . ? 
C13 N2 1.350(2) . ? 
C13 H13 0.9500 . ? 
C14 N3 1.353(2) . ? 
C14 C15 1.380(2) . ? 
C15 C16 1.389(2) . ? 
C15 H15 0.9500 . ? 
C16 C17 1.384(3) . ? 
C16 H16 0.9500 . ? 
C17 C18 1.384(2) . ? 
C17 H17 0.9500 . ? 
C18 N3 1.343(2) . ? 
C18 H18 0.9500 . ? 
C19 N1 1.4967(19) . ? 
C19 C20 1.500(2) . ? 
C19 H19A 0.9900 . ? 
C19 H19B 0.9900 . ? 
C20 N4 1.351(2) . ? 
C20 C21 1.389(2) . ? 
C21 C22 1.384(3) . ? 
C21 H21 0.9500 . ? 
C22 C23 1.383(3) . ? 
C22 H22 0.9500 . ? 
C23 C24 1.383(2) . ? 
C23 H23 0.9500 . ? 
C24 N4 1.347(2) . ? 
C24 H24 0.9500 . ? 
C25 N5 1.140(2) . ? 
C25 C26 1.454(2) . ? 
C26 H26A 0.9800 . ? 
C26 H26B 0.9800 . ? 
C26 H26C 0.9800 . ? 
B1 F3 1.365(8) . ? 
B1 F1 1.375(8) . ? 
B1 F2 1.376(8) . ? 
B1 F4 1.381(8) . ? 
B1' F2' 1.361(11) . ? 
B1' F1' 1.382(11) . ? 
B1' F4' 1.382(11) . ? 
B1' F3' 1.382(11) . ? 
 
loop_ 
 _geom_angle_atom_site_label_1 
 _geom_angle_atom_site_label_2 
 _geom_angle_atom_site_label_3 
 _geom_angle 
 _geom_angle_site_symmetry_1 
 _geom_angle_site_symmetry_3 
 _geom_angle_publ_flag 
N5 Fe1 N2 94.34(6) . . ? 
N5 Fe1 N4 98.43(6) . . ? 
N2 Fe1 N4 167.21(5) . . ? 
N5 Fe1 N3 92.93(5) . . ? 
N2 Fe1 N3 87.32(5) . . ? 
N4 Fe1 N3 92.69(5) . . ? 
N5 Fe1 N1 174.58(5) . . ? 
N2 Fe1 N1 83.13(5) . . ? 
N4 Fe1 N1 84.20(5) . . ? 
N3 Fe1 N1 82.19(5) . . ? 
N5 Fe1 S1 87.99(4) . . ? 
N2 Fe1 S1 89.98(4) . . ? 
N4 Fe1 S1 89.78(4) . . ? 
N3 Fe1 S1 177.21(4) . . ? 
N1 Fe1 S1 96.78(4) . . ? 
C1 S1 Fe1 105.61(5) . . ? 
C2 C1 C6 118.30(14) . . ? 
C2 C1 S1 119.46(12) . . ? 
C6 C1 S1 122.23(12) . . ? 
C3 C2 C1 121.61(15) . . ? 
C3 C2 H2 119.2 . . ? 
C1 C2 H2 119.2 . . ? 
C4 C3 C2 119.92(15) . . ? 
C4 C3 H3 120.0 . . ? 
C2 C3 H3 120.0 . . ? 
C3 C4 C5 119.53(15) . . ? 
C3 C4 H4 120.2 . . ? 
C5 C4 H4 120.2 . . ? 
C4 C5 C6 121.16(15) . . ? 
C4 C5 H5 119.4 . . ? 
C6 C5 H5 119.4 . . ? 
C5 C6 C1 119.45(14) . . ? 
C5 C6 C7 119.89(14) . . ? 
C1 C6 C7 120.48(13) . . ? 
C6 C7 N1 113.90(12) . . ? 
C6 C7 H7A 108.8 . . ? 
N1 C7 H7A 108.8 . . ? 
C6 C7 H7B 108.8 . . ? 
N1 C7 H7B 108.8 . . ? 
H7A C7 H7B 107.7 . . ? 
N1 C8 C14 107.20(12) . . ? 
N1 C8 C9 105.24(12) . . ? 
C14 C8 C9 105.11(12) . . ? 
N1 C8 H8 112.9 . . ? 
C14 C8 H8 112.9 . . ? 
C9 C8 H8 112.9 . . ? 
N2 C9 C10 122.79(15) . . ? 
N2 C9 C8 111.34(13) . . ? 
C10 C9 C8 125.83(14) . . ? 
C11 C10 C9 118.25(16) . . ? 
C11 C10 H10 120.9 . . ? 
C9 C10 H10 120.9 . . ? 
C10 C11 C12 119.40(16) . . ? 
C10 C11 H11 120.3 . . ? 
C12 C11 H11 120.3 . . ? 
C13 C12 C11 119.52(16) . . ? 
C13 C12 H12 120.2 . . ? 
C11 C12 H12 120.2 . . ? 
N2 C13 C12 121.57(16) . . ? 
N2 C13 H13 119.2 . . ? 
C12 C13 H13 119.2 . . ? 
N3 C14 C15 122.96(15) . . ? 
N3 C14 C8 111.28(13) . . ? 
C15 C14 C8 125.54(15) . . ? 
C14 C15 C16 118.13(16) . . ? 
C14 C15 H15 120.9 . . ? 
C16 C15 H15 120.9 . . ? 
C17 C16 C15 119.29(15) . . ? 
C17 C16 H16 120.4 . . ? 
C15 C16 H16 120.4 . . ? 
C16 C17 C18 119.39(16) . . ? 
C16 C17 H17 120.3 . . ? 
C18 C17 H17 120.3 . . ? 
N3 C18 C17 121.83(16) . . ? 
N3 C18 H18 119.1 . . ? 
C17 C18 H18 119.1 . . ? 
N1 C19 C20 108.89(12) . . ? 
N1 C19 H19A 109.9 . . ? 
C20 C19 H19A 109.9 . . ? 
N1 C19 H19B 109.9 . . ? 
C20 C19 H19B 109.9 . . ? 
H19A C19 H19B 108.3 . . ? 
N4 C20 C21 122.00(15) . . ? 
N4 C20 C19 115.08(13) . . ? 
C21 C20 C19 122.87(15) . . ? 
C22 C21 C20 119.03(16) . . ? 
C22 C21 H21 120.5 . . ? 
C20 C21 H21 120.5 . . ? 
C23 C22 C21 119.09(16) . . ? 
C23 C22 H22 120.5 . . ? 
C21 C22 H22 120.5 . . ? 
C24 C23 C22 118.98(16) . . ? 
C24 C23 H23 120.5 . . ? 
C22 C23 H23 120.5 . . ? 
N4 C24 C23 122.45(16) . . ? 
N4 C24 H24 118.8 . . ? 
C23 C24 H24 118.8 . . ? 
N5 C25 C26 179.61(19) . . ? 
C25 C26 H26A 109.5 . . ? 
C25 C26 H26B 109.5 . . ? 
H26A C26 H26B 109.5 . . ? 
C25 C26 H26C 109.5 . . ? 
H26A C26 H26C 109.5 . . ? 
H26B C26 H26C 109.5 . . ? 
C19 N1 C7 110.21(11) . . ? 
C19 N1 C8 113.49(11) . . ? 
C7 N1 C8 109.78(11) . . ? 
C19 N1 Fe1 108.92(9) . . ? 
C7 N1 Fe1 116.27(9) . . ? 
C8 N1 Fe1 97.76(9) . . ? 
C13 N2 C9 118.44(14) . . ? 
C13 N2 Fe1 129.86(11) . . ? 
C9 N2 Fe1 111.42(10) . . ? 
C18 N3 C14 118.37(13) . . ? 
C18 N3 Fe1 130.20(11) . . ? 
C14 N3 Fe1 111.23(10) . . ? 
C24 N4 C20 118.36(14) . . ? 
C24 N4 Fe1 126.85(11) . . ? 
C20 N4 Fe1 114.29(10) . . ? 
C25 N5 Fe1 174.87(14) . . ? 
F3 B1 F1 110.4(6) . . ? 
F3 B1 F2 108.5(7) . . ? 
F1 B1 F2 108.9(6) . . ? 
F3 B1 F4 109.8(8) . . ? 
F1 B1 F4 110.4(8) . . ? 
F2 B1 F4 108.8(7) . . ? 
F2' B1' F1' 112.6(9) . . ? 
F2' B1' F4' 111.8(11) . . ? 
F1' B1' F4' 107.6(10) . . ? 
F2' B1' F3' 110.2(10) . . ? 
F1' B1' F3' 104.9(9) . . ? 
F4' B1' F3' 109.5(10) . . ? 
 
loop_ 
 _geom_torsion_atom_site_label_1 
 _geom_torsion_atom_site_label_2 
 _geom_torsion_atom_site_label_3 
 _geom_torsion_atom_site_label_4 
 _geom_torsion 
 _geom_torsion_site_symmetry_1 
 _geom_torsion_site_symmetry_2 
 _geom_torsion_site_symmetry_3 
 _geom_torsion_site_symmetry_4 
 _geom_torsion_publ_flag 
N5 Fe1 S1 C1 -153.57(7) . . . . ? 
N2 Fe1 S1 C1 112.09(7) . . . . ? 
N4 Fe1 S1 C1 -55.12(7) . . . . ? 
N1 Fe1 S1 C1 29.01(7) . . . . ? 
Fe1 S1 C1 C2 140.95(11) . . . . ? 
Fe1 S1 C1 C6 -39.98(13) . . . . ? 
C6 C1 C2 C3 -1.5(2) . . . . ? 
S1 C1 C2 C3 177.63(13) . . . . ? 
C1 C2 C3 C4 0.8(3) . . . . ? 
C2 C3 C4 C5 0.5(3) . . . . ? 
C3 C4 C5 C6 -1.2(3) . . . . ? 
C4 C5 C6 C1 0.5(2) . . . . ? 
C4 C5 C6 C7 -174.63(15) . . . . ? 
C2 C1 C6 C5 0.8(2) . . . . ? 
S1 C1 C6 C5 -178.28(12) . . . . ? 
C2 C1 C6 C7 175.91(14) . . . . ? 
S1 C1 C6 C7 -3.2(2) . . . . ? 
C5 C6 C7 N1 -119.07(15) . . . . ? 
C1 C6 C7 N1 65.83(18) . . . . ? 
N1 C8 C9 N2 43.55(16) . . . . ? 
C14 C8 C9 N2 -69.46(15) . . . . ? 
N1 C8 C9 C10 -138.48(15) . . . . ? 
C14 C8 C9 C10 108.51(17) . . . . ? 
N2 C9 C10 C11 -0.6(2) . . . . ? 
C8 C9 C10 C11 -178.33(14) . . . . ? 
C9 C10 C11 C12 -0.4(2) . . . . ? 
C10 C11 C12 C13 0.4(2) . . . . ? 
C11 C12 C13 N2 0.6(2) . . . . ? 
N1 C8 C14 N3 -37.42(16) . . . . ? 
C9 C8 C14 N3 74.21(15) . . . . ? 
N1 C8 C14 C15 147.82(15) . . . . ? 
C9 C8 C14 C15 -100.55(17) . . . . ? 
N3 C14 C15 C16 0.7(2) . . . . ? 
C8 C14 C15 C16 174.88(15) . . . . ? 
C14 C15 C16 C17 1.0(2) . . . . ? 
C15 C16 C17 C18 -1.4(2) . . . . ? 
C16 C17 C18 N3 0.0(2) . . . . ? 
N1 C19 C20 N4 -28.96(17) . . . . ? 
N1 C19 C20 C21 153.43(14) . . . . ? 
N4 C20 C21 C22 -2.2(2) . . . . ? 
C19 C20 C21 C22 175.23(15) . . . . ? 
C20 C21 C22 C23 -0.3(2) . . . . ? 
C21 C22 C23 C24 2.1(3) . . . . ? 
C22 C23 C24 N4 -1.5(2) . . . . ? 
C20 C19 N1 C7 -97.90(14) . . . . ? 
C20 C19 N1 C8 138.51(13) . . . . ? 
C20 C19 N1 Fe1 30.77(14) . . . . ? 
C6 C7 N1 C19 58.24(16) . . . . ? 
C6 C7 N1 C8 -176.04(12) . . . . ? 
C6 C7 N1 Fe1 -66.31(14) . . . . ? 
C14 C8 N1 C19 -59.43(15) . . . . ? 
C9 C8 N1 C19 -170.97(12) . . . . ? 
C14 C8 N1 C7 176.74(12) . . . . ? 
C9 C8 N1 C7 65.21(14) . . . . ? 
C14 C8 N1 Fe1 55.16(11) . . . . ? 
C9 C8 N1 Fe1 -56.38(11) . . . . ? 
N2 Fe1 N1 C19 161.64(10) . . . . ? 
N4 Fe1 N1 C19 -20.11(9) . . . . ? 
N3 Fe1 N1 C19 73.42(10) . . . . ? 
S1 Fe1 N1 C19 -109.20(9) . . . . ? 
N2 Fe1 N1 C7 -73.15(10) . . . . ? 
N4 Fe1 N1 C7 105.10(10) . . . . ? 
N3 Fe1 N1 C7 -161.37(11) . . . . ? 
S1 Fe1 N1 C7 16.01(10) . . . . ? 
N2 Fe1 N1 C8 43.48(9) . . . . ? 
N4 Fe1 N1 C8 -138.27(9) . . . . ? 
N3 Fe1 N1 C8 -44.74(8) . . . . ? 
S1 Fe1 N1 C8 132.64(8) . . . . ? 
C12 C13 N2 C9 -1.5(2) . . . . ? 
C12 C13 N2 Fe1 -174.75(12) . . . . ? 
C10 C9 N2 C13 1.5(2) . . . . ? 
C8 C9 N2 C13 179.52(13) . . . . ? 
C10 C9 N2 Fe1 175.95(12) . . . . ? 
C8 C9 N2 Fe1 -6.00(15) . . . . ? 
N5 Fe1 N2 C13 -34.13(14) . . . . ? 
N4 Fe1 N2 C13 142.8(2) . . . . ? 
N3 Fe1 N2 C13 -126.86(14) . . . . ? 
N1 Fe1 N2 C13 150.69(14) . . . . ? 
S1 Fe1 N2 C13 53.85(13) . . . . ? 
N5 Fe1 N2 C9 152.20(10) . . . . ? 
N4 Fe1 N2 C9 -30.9(3) . . . . ? 
N3 Fe1 N2 C9 59.47(10) . . . . ? 
N1 Fe1 N2 C9 -22.99(10) . . . . ? 
S1 Fe1 N2 C9 -119.82(10) . . . . ? 
C17 C18 N3 C14 1.7(2) . . . . ? 
C17 C18 N3 Fe1 -172.70(12) . . . . ? 
C15 C14 N3 C18 -2.1(2) . . . . ? 
C8 C14 N3 C18 -176.99(13) . . . . ? 
C15 C14 N3 Fe1 173.35(12) . . . . ? 
C8 C14 N3 Fe1 -1.57(15) . . . . ? 
N5 Fe1 N3 C18 25.47(14) . . . . ? 
N2 Fe1 N3 C18 119.68(14) . . . . ? 
N4 Fe1 N3 C18 -73.12(14) . . . . ? 
N1 Fe1 N3 C18 -156.89(14) . . . . ? 
N5 Fe1 N3 C14 -149.24(11) . . . . ? 
N2 Fe1 N3 C14 -55.04(11) . . . . ? 
N4 Fe1 N3 C14 112.16(11) . . . . ? 
N1 Fe1 N3 C14 28.39(10) . . . . ? 
C23 C24 N4 C20 -0.9(2) . . . . ? 
C23 C24 N4 Fe1 170.53(12) . . . . ? 
C21 C20 N4 C24 2.8(2) . . . . ? 
C19 C20 N4 C24 -174.80(13) . . . . ? 
C21 C20 N4 Fe1 -169.69(12) . . . . ? 
C19 C20 N4 Fe1 12.69(16) . . . . ? 
N5 Fe1 N4 C24 17.63(13) . . . . ? 
N2 Fe1 N4 C24 -159.3(2) . . . . ? 
N3 Fe1 N4 C24 110.99(13) . . . . ? 
N1 Fe1 N4 C24 -167.15(13) . . . . ? 
S1 Fe1 N4 C24 -70.31(13) . . . . ? 
N5 Fe1 N4 C20 -170.62(10) . . . . ? 
N2 Fe1 N4 C20 12.5(3) . . . . ? 
N3 Fe1 N4 C20 -77.26(11) . . . . ? 
N1 Fe1 N4 C20 4.61(10) . . . . ? 
S1 Fe1 N4 C20 101.45(10) . . . . ? 
 
_diffrn_measured_fraction_theta_max    1.000 
_diffrn_reflns_theta_full              27.50 
_diffrn_measured_fraction_theta_full   1.000 
_refine_diff_density_max    0.548 
_refine_diff_density_min   -0.529 
_refine_diff_density_rms    0.063

_iucr_refine_instructions_details
;
TITL x0759a - SHELXL
CELL  0.71073   12.40931   14.52864   27.6028    90.000    90.000    90.000
ZERR     8    0.00014    0.00016    0.0003    0.0000    0.0000    0.0000
LATT   1
SYMM     0.50000 - X ,            - Y ,    0.50000 + Z
SYMM     0.50000 + X ,    0.50000 - Y ,            - Z
SYMM             - X ,    0.50000 + Y ,    0.50000 - Z
SFAC  C  H  B  F  FE  N  S
UNIT   208  192   8  32   8  40   8
 
TEMP -163
 
ACTA
HTAB
BOND
BOND $H
CONF
WPDB
 
L.S. 6
FMAP 2
PLAN 10
OMIT -2 55
 
WGHT    0.034300    3.680200
FVAR       2.46046   0.58807
PART 0
rem Fe complex
FE1   5    0.857518    0.158451    0.125204    11.00000    0.01111    0.01315 =
         0.01391   -0.00061   -0.00070    0.00041
S1    7    0.815032    0.295746    0.162174    11.00000    0.01285    0.01468 =
         0.02035   -0.00322    0.00080   -0.00084
C1    1    0.680550    0.285115    0.180343    11.00000    0.01442    0.01244 =
         0.01926    0.00101    0.00097    0.00147
C2    1    0.648247    0.321597    0.225053    11.00000    0.01970    0.01762 =
         0.02220   -0.00334    0.00019   -0.00032
AFIX  43
H2    2    0.700531    0.349569    0.245430    11.00000   -1.20000
AFIX   0
C3    1    0.541968    0.317863    0.240251    11.00000    0.02411    0.02214 =
         0.02341   -0.00386    0.00720    0.00220
AFIX  43
H3    2    0.521897    0.343799    0.270528    11.00000   -1.20000
AFIX   0
C4    1    0.465054    0.276313    0.211282    11.00000    0.01614    0.02488 =
         0.02925    0.00029    0.00573    0.00102
AFIX  43
H4    2    0.391950    0.274028    0.221428    11.00000   -1.20000
AFIX   0
C5    1    0.495538    0.237913    0.167200    11.00000    0.01409    0.02278 =
         0.02509   -0.00041   -0.00050   -0.00061
AFIX  43
H5    2    0.442883    0.208388    0.147639    11.00000   -1.20000
AFIX   0
C6    1    0.602275    0.242005    0.151180    11.00000    0.01530    0.01437 =
         0.01869    0.00054    0.00024    0.00225
C7    1    0.630844    0.207420    0.101646    11.00000    0.01365    0.01981 =
         0.01688   -0.00077   -0.00279    0.00256
AFIX  23
H7A   2    0.661446    0.258902    0.082597    11.00000   -1.20000
H7B   2    0.564148    0.186974    0.085168    11.00000   -1.20000
AFIX   0
C8    1    0.739341    0.104054    0.050548    11.00000    0.01563    0.01940 =
         0.01481   -0.00374   -0.00085   -0.00049
AFIX  13
H8    2    0.675411    0.086065    0.030628    11.00000   -1.20000
AFIX   0
C9    1    0.797672    0.187161    0.030642    11.00000    0.01592    0.01756 =
         0.01667   -0.00243    0.00053    0.00405
C10   1    0.784892    0.223784   -0.015282    11.00000    0.02452    0.02466 =
         0.01602   -0.00165   -0.00003    0.00748
AFIX  43
H10   2    0.734756    0.197947   -0.037453    11.00000   -1.20000
AFIX   0
C11   1    0.847015    0.298966   -0.028044    11.00000    0.03317    0.02588 =
         0.01672    0.00431    0.00725    0.01005
AFIX  43
H11   2    0.840443    0.325493   -0.059363    11.00000   -1.20000
AFIX   0
C12   1    0.918965    0.335282    0.005263    11.00000    0.02524    0.01932 =
         0.02737    0.00370    0.01131    0.00298
AFIX  43
H12   2    0.961826    0.387144   -0.002988    11.00000   -1.20000
AFIX   0
C13   1    0.927911    0.295506    0.050567    11.00000    0.01781    0.01776 =
         0.02360   -0.00124    0.00502    0.00143
AFIX  43
H13   2    0.976868    0.320986    0.073376    11.00000   -1.20000
AFIX   0
C14   1    0.823616    0.029347    0.053240    11.00000    0.01771    0.01651 =
         0.01678   -0.00107    0.00212   -0.00296
C15   1    0.836616   -0.041011    0.020175    11.00000    0.02514    0.01933 =
         0.02089   -0.00440    0.00420   -0.00556
AFIX  43
H15   2    0.787292   -0.048953   -0.005812    11.00000   -1.20000
AFIX   0
C16   1    0.923872   -0.099909    0.025959    11.00000    0.03201    0.01583 =
         0.02784   -0.00541    0.01105   -0.00205
AFIX  43
H16   2    0.935931   -0.148467    0.003556    11.00000   -1.20000
AFIX   0
C17   1    0.993023   -0.087086    0.064701    11.00000    0.02441    0.01710 =
         0.03217    0.00145    0.00781    0.00471
AFIX  43
H17   2    1.052151   -0.127583    0.069556    11.00000   -1.20000
AFIX   0
C18   1    0.975251   -0.014700    0.096319    11.00000    0.01956    0.01850 =
         0.02469    0.00124    0.00200    0.00273
AFIX  43
H18   2    1.022932   -0.006181    0.122870    11.00000   -1.20000
AFIX   0
C19   1    0.666527    0.050210    0.130565    11.00000    0.01649    0.01530 =
         0.02168   -0.00163    0.00182   -0.00409
AFIX  23
H19A  2    0.685828   -0.008624    0.114687    11.00000   -1.20000
H19B  2    0.586986    0.054253    0.132327    11.00000   -1.20000
AFIX   0
C20   1    0.713527    0.053427    0.180614    11.00000    0.02244    0.01169 =
         0.01970   -0.00095    0.00287    0.00226
C21   1    0.661744    0.016482    0.220751    11.00000    0.03073    0.01645 =
         0.02578   -0.00014    0.00815   -0.00182
AFIX  43
H21   2    0.591198   -0.008334    0.217912    11.00000   -1.20000
AFIX   0
C22   1    0.714402    0.016343    0.264942    11.00000    0.04689    0.02009 =
         0.02073    0.00248    0.01017    0.00168
AFIX  43
H22   2    0.680362   -0.008299    0.292908    11.00000   -1.20000
AFIX   0
C23   1    0.817295    0.052581    0.267839    11.00000    0.04282    0.02351 =
         0.01523   -0.00011   -0.00076    0.00538
AFIX  43
H23   2    0.855864    0.051341    0.297562    11.00000   -1.20000
AFIX   0
C24   1    0.863151    0.090643    0.226796    11.00000    0.02665    0.01915 =
         0.01771   -0.00182   -0.00301    0.00452
AFIX  43
H24   2    0.933116    0.116823    0.229095    11.00000   -1.20000
AFIX   0
C25   1    1.092288    0.196745    0.149853    11.00000    0.01795    0.02175 =
         0.02141   -0.00062   -0.00111    0.00263
C26   1    1.204999    0.218159    0.158815    11.00000    0.01470    0.03493 =
         0.03772    0.00265   -0.00329   -0.00216
AFIX 137
H26A  2    1.250552    0.171034    0.143786    11.00000   -1.50000
H26B  2    1.218271    0.219420    0.193808    11.00000   -1.50000
H26C  2    1.222141    0.278457    0.144892    11.00000   -1.50000
AFIX   0
N1    6    0.710074    0.129255    0.101826    11.00000    0.01423    0.01538 =
         0.01444   -0.00129    0.00012   -0.00049
N2    6    0.868751    0.221325    0.063179    11.00000    0.01412    0.01554 =
         0.01684   -0.00078    0.00132    0.00162
N3    6    0.892451    0.043830    0.090501    11.00000    0.01626    0.01523 =
         0.01693    0.00006    0.00176   -0.00035
N4    6    0.812322    0.091973    0.183703    11.00000    0.01900    0.01371 =
         0.01662   -0.00063    0.00037    0.00271
N5    6    1.004047    0.179992    0.142551    11.00000    0.01616    0.01788 =
         0.01941   -0.00197   -0.00045    0.00232
 
DELU 0.005 B1 > F4'
SIMU 0.01 B1 > F4'
 
PART 1
B1    3    0.148339    0.467581    0.101920    21.00000    0.02630    0.02575 =
         0.02097   -0.00496    0.00092   -0.00207
F1    4    0.254665    0.444704    0.109186    21.00000    0.02549    0.10249 =
         0.06523    0.00879    0.00345    0.00783
F2    4    0.084948    0.413249    0.131168    21.00000    0.03857    0.04095 =
         0.03589    0.01136    0.00325   -0.00946
F3    4    0.130900    0.557517    0.113888    21.00000    0.12049    0.02227 =
         0.02993   -0.00164    0.00494   -0.00307
F4    4    0.119633    0.452793    0.054198    21.00000    0.06129    0.06364 =
         0.02281   -0.01373    0.00669   -0.02387
 
PART 2
SAME B1 > F4
B1'   3    0.153739    0.474968    0.097830   -21.00000    0.02939    0.02260 =
         0.02414   -0.00085    0.00667    0.00310
F1'   4    0.262761    0.492904    0.101665   -21.00000    0.02164    0.10614 =
         0.07280   -0.01742   -0.00304    0.00466
F2'   4    0.122305    0.402219    0.125501   -21.00000    0.10126    0.02689 =
         0.05801    0.01957   -0.01077   -0.00992
F3'   4    0.103812    0.554567    0.113578   -21.00000    0.03163    0.02905 =
         0.03540   -0.00842    0.00888    0.01105
F4'   4    0.130962    0.461182    0.049356   -21.00000    0.04644    0.03439 =
         0.02207   -0.00914    0.00577    0.00471
 
HKLF    4
 
REM  x0759a - SHELXL
REM R1 =  0.0297 for   5028 Fo > 4sig(Fo)  and  0.0355 for all   5709 data
REM    390 parameters refined using    156 restraints
 
END  
     
WGHT      0.0343      3.6799 
REM Highest difference peak  0.548,  deepest hole -0.529,  1-sigma level  0.063
Q1    1   0.2191  0.5443  0.1103  11.00000  0.05    0.55
Q2    1   0.0952  0.4692  0.1393  11.00000  0.05    0.35
Q3    1   0.0421  0.4994  0.0672  11.00000  0.05    0.34
Q4    1   0.8612  0.1679  0.1582  11.00000  0.05    0.33
Q5    1   0.6849  0.0601  0.1592  11.00000  0.05    0.32
Q6    1   0.7824  0.0668  0.0527  11.00000  0.05    0.31
Q7    1   0.8558  0.1541  0.0922  11.00000  0.05    0.30
Q8    1   0.7658  0.1499  0.0409  11.00000  0.05    0.30
Q9    1   0.6182  0.2217  0.1289  11.00000  0.05    0.29
Q10   1   0.5483  0.2488  0.1598  11.00000  0.05    0.29
;
